# Supplementary material
Source: PubMed Central journal article supplement (PMC5628110)
Supplement: NIHMS865826-supplement.pdf [file NIHMS865826-supplement.pdf]

## Supplementary Figures

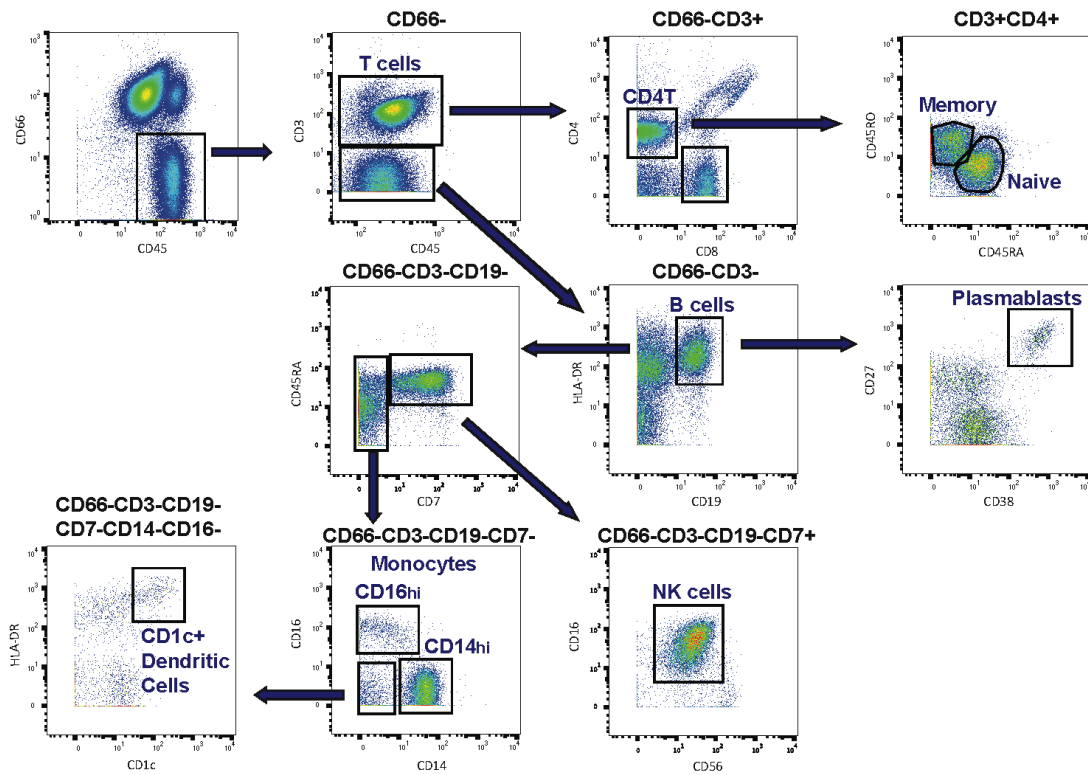

**Figure S1. Gating strategy for peripheral blood leukocyte cell subpopulations.** Whole blood was processed and analyzed via mass cytometry as in **Figure 1**. CD4, CD8, CD45RA, CD45RO were used to subset T cells. CD19, HLADR, CD27, and CD38 were used to subset B cells. CD16, CD56, and CD7 were used to subset NK cells. CD16 and CD14 were used to subset monocytes. CD1c was used to subset dendritic cells. Representative data from one donor are shown.

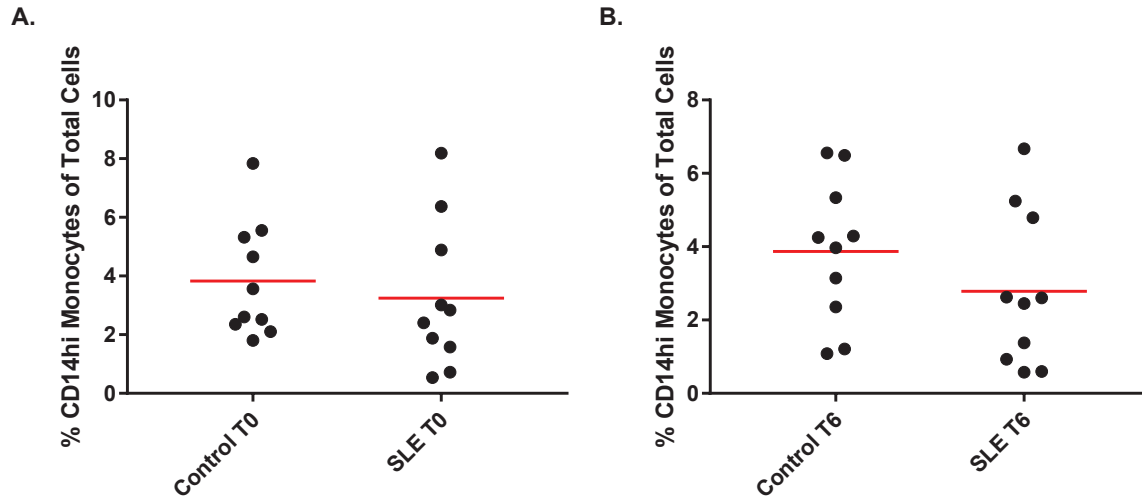

**Figure S2. Variance in frequency of CD14<sup>hi</sup> monocytes in SLE patients and controls peripheral blood samples.** Whole blood from SLE patients and controls was processed and analyzed via mass cytometry as in **Figure 1**, at T0 and T6 timepoints. CD14<sup>hi</sup> population frequency is calculated as the percent of CD66<sup>-</sup>CD3<sup>-</sup>CD19<sup>-</sup>CD7<sup>-</sup>CD33<sup>+</sup>CD11c<sup>+</sup>HLADR<sup>+</sup>CD14<sup>hi</sup>CD16<sup>lo</sup>CD4<sup>+</sup> cells out of CD45<sup>+</sup> total cells analyzed via mass cytometry, for each specific sample. Each dot represents a patient or control sample, at either T0 (**A**) or T6 (**B**), and the red line represents the average within the group. Average for 10 patients and 10 controls are shown. Mann-Whitney calculation yielded p-value=0.48 for T0 (**A**) and p=0.28 for T6 (**B**).

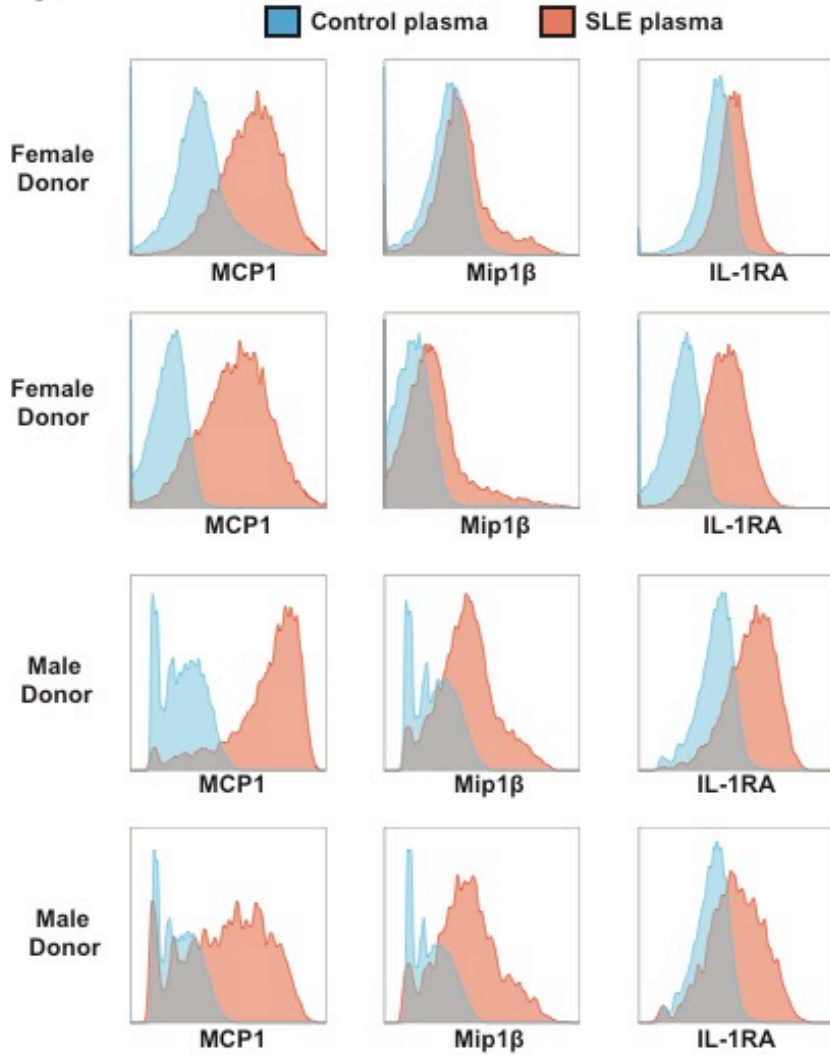

**Figure S3. Effect of healthy donor gender in the induction of the monocyte MCP1/Mip1 $\beta$ /IL-1RA signature by SLE plasma.** Plasma from one pair of female SLE patient and healthy matched control were separately incubated with two different female and two different male healthy donor blood samples. Blood samples were processed and analyzed by mass cytometry as in **Figure 1**. Hand-gated on CD14<sup>hi</sup> monocytes, histograms for MCP1, Mip1 $\beta$ , and IL-1RA cytokines are shown, induced either by SLE plasma (red) or control plasma (blue).

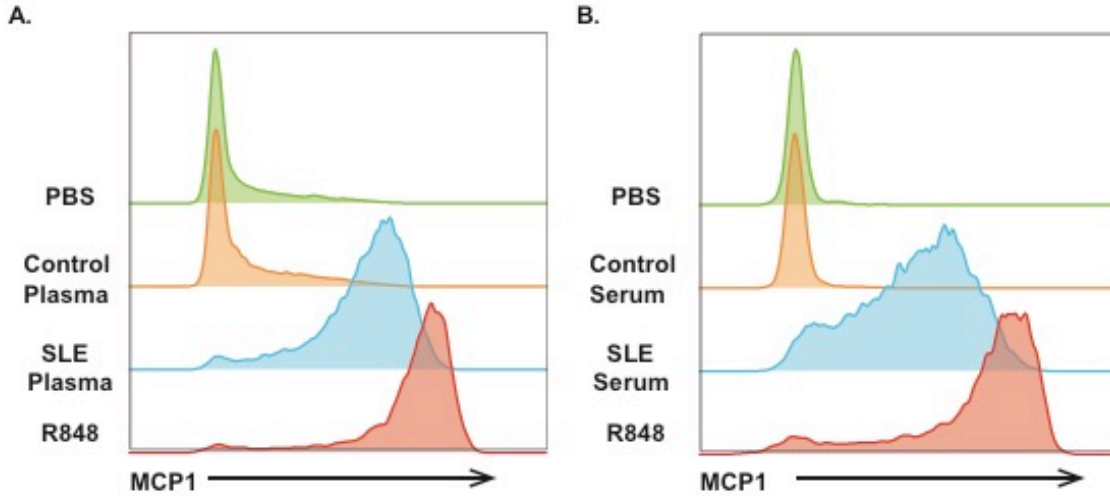

**Figure S4. Effect of plasma vs. serum in the induction of the monocyte MCP1/Mip1 $\beta$ /IL-1RA signature.** Plasma and serum from one pair of female SLE patient and healthy matched control were separately incubated with one healthy donor peripheral blood sample, then processed and analyzed by mass cytometry as in **Figure 1**. Hand-gated on CD14<sup>hi</sup> monocytes, histograms for MCP1 are shown, induced either by SLE plasma (**A**) or serum (**B**). R848 stimulation of healthy donor peripheral blood was included as positive technical control. One representative data set shown.

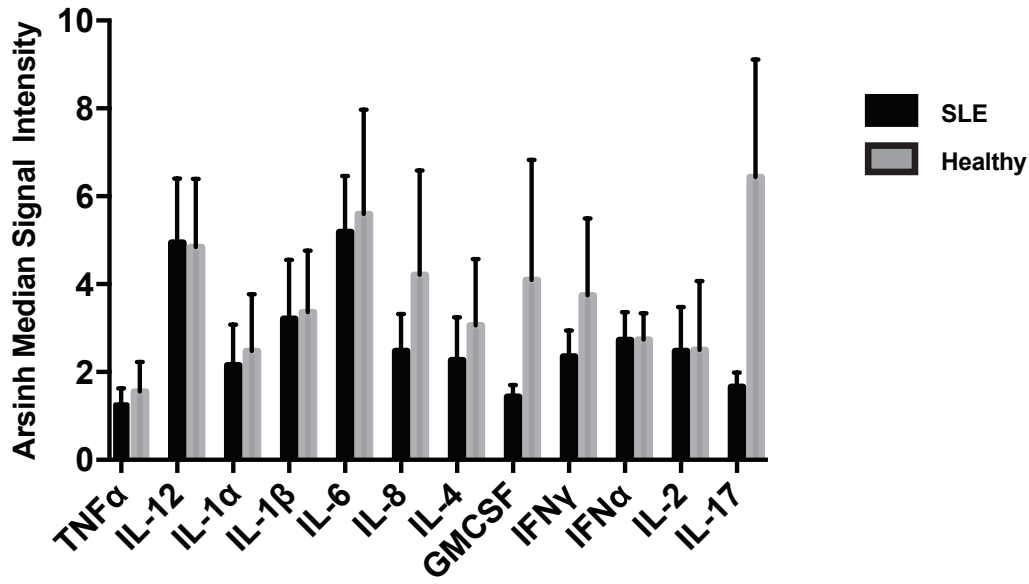

**Figure S5. Variance in CD14<sup>hi</sup> monocytes cytokine induction in healthy donor blood, by serum from SLE patients (black) and controls (grey).** Following incubation of serum samples with healthy donor peripheral whole blood, cells were processed and analyzed by mass cytometry as described in **Figure 1**. CD14<sup>hi</sup> monocyte population was defined as in **Figure 3C**. Median count values from healthy donor blood incubated with or without serum samples were subtracted (Control PT6-Healthy T0, SLE PT6-Healthy T0) to create a response index (median signal intensity). Average responses from 18 SLE patients sera, and 18 control sera with standard deviation are shown.

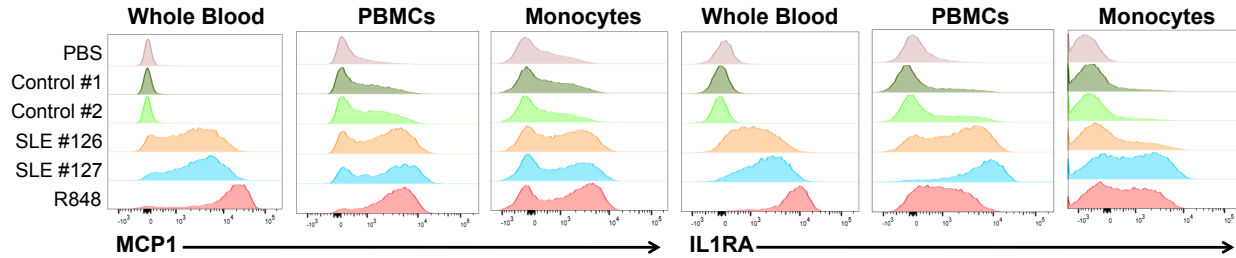

**Figure S6. MCP1 and IL1RA are induced by plasma from SLE patients and R848 when incubated with whole blood, PBMCs, and CD14<sup>hi</sup> monocytes.** Plasma from SLE patients (SLE #126, SLE #127), healthy participants (Control #1, Control #2), and R848 were incubated for 6 hours at 37C with a protein transport inhibitor with whole blood, PBMCs, or CD14<sup>hi</sup> monocytes isolated from one healthy donor (different from healthy participants' plasma). Processed cells were stained with fluorescently labeled antibodies (**Table S5**) and analyzed by flow cytometry. Hand-gated on CD14<sup>hi</sup> monocytes, histograms for MCP1 and IL1RA are shown. MCP1 and IL1RA were induced by plasma from SLE patients and R848, in all conditions (whole blood, PBMCs, and CD14<sup>hi</sup> monocytes), with a bimodal distribution in the CD14<sup>hi</sup> monocytes, likely related to the cellular isolation process.

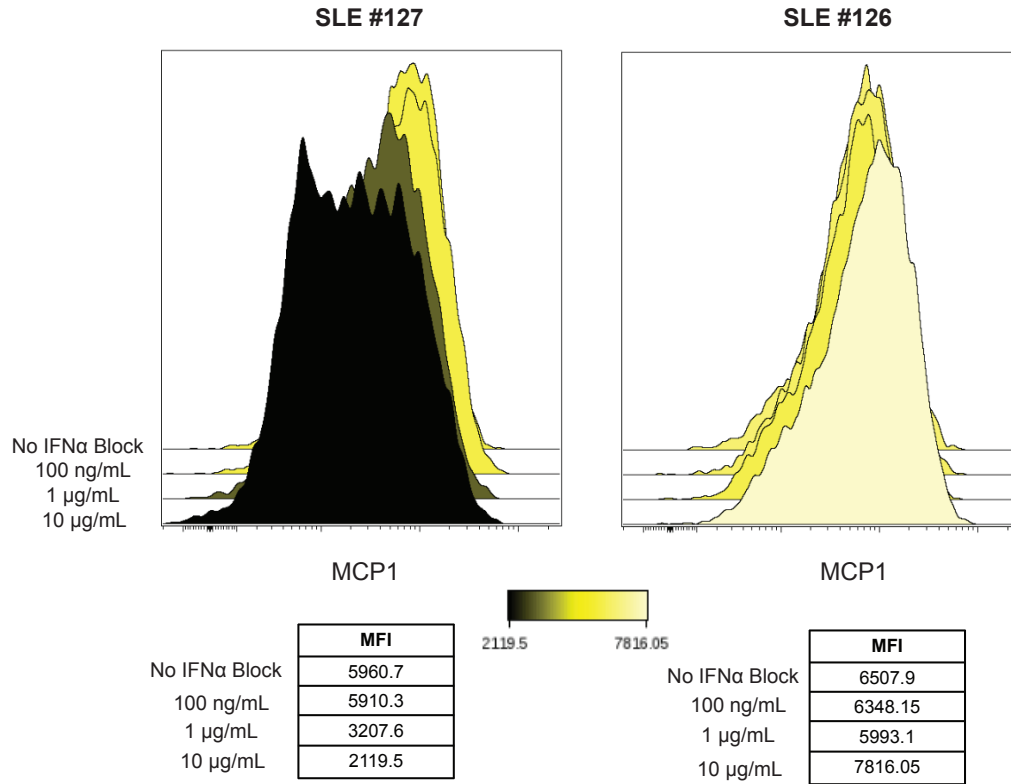

**Figure S7. Effect of anti-IFN $\alpha$  on SLE-plasma induced MCP1 production.** Plasma samples from SLE patients were incubated for 1 hour at 37C with anti-IFN $\alpha$  IgA antibody at several increasing concentrations separately (indicated above). Following this anti-IFN $\alpha$  treatment, these plasma samples were incubated with healthy donor peripheral whole blood, and cells were lysed and fixed as described in Figure 1. Processed cells were stained with fluorescently labeled antibodies (Table S5) and analyzed by flow cytometry. Hand-gated on CD14hi monocytes, histograms for MCP1 are shown. MCP1 is induced by SLE plasma samples (no IFN $\alpha$  block). In SLE #127, MCP1 production is decreased with increasing concentrations of anti-IFN $\alpha$  that were pre-incubated with SLE plasma. However, in SLE#126, MCP1 production remains grossly unchanged with increasing concentrations of anti-IFN $\alpha$ .

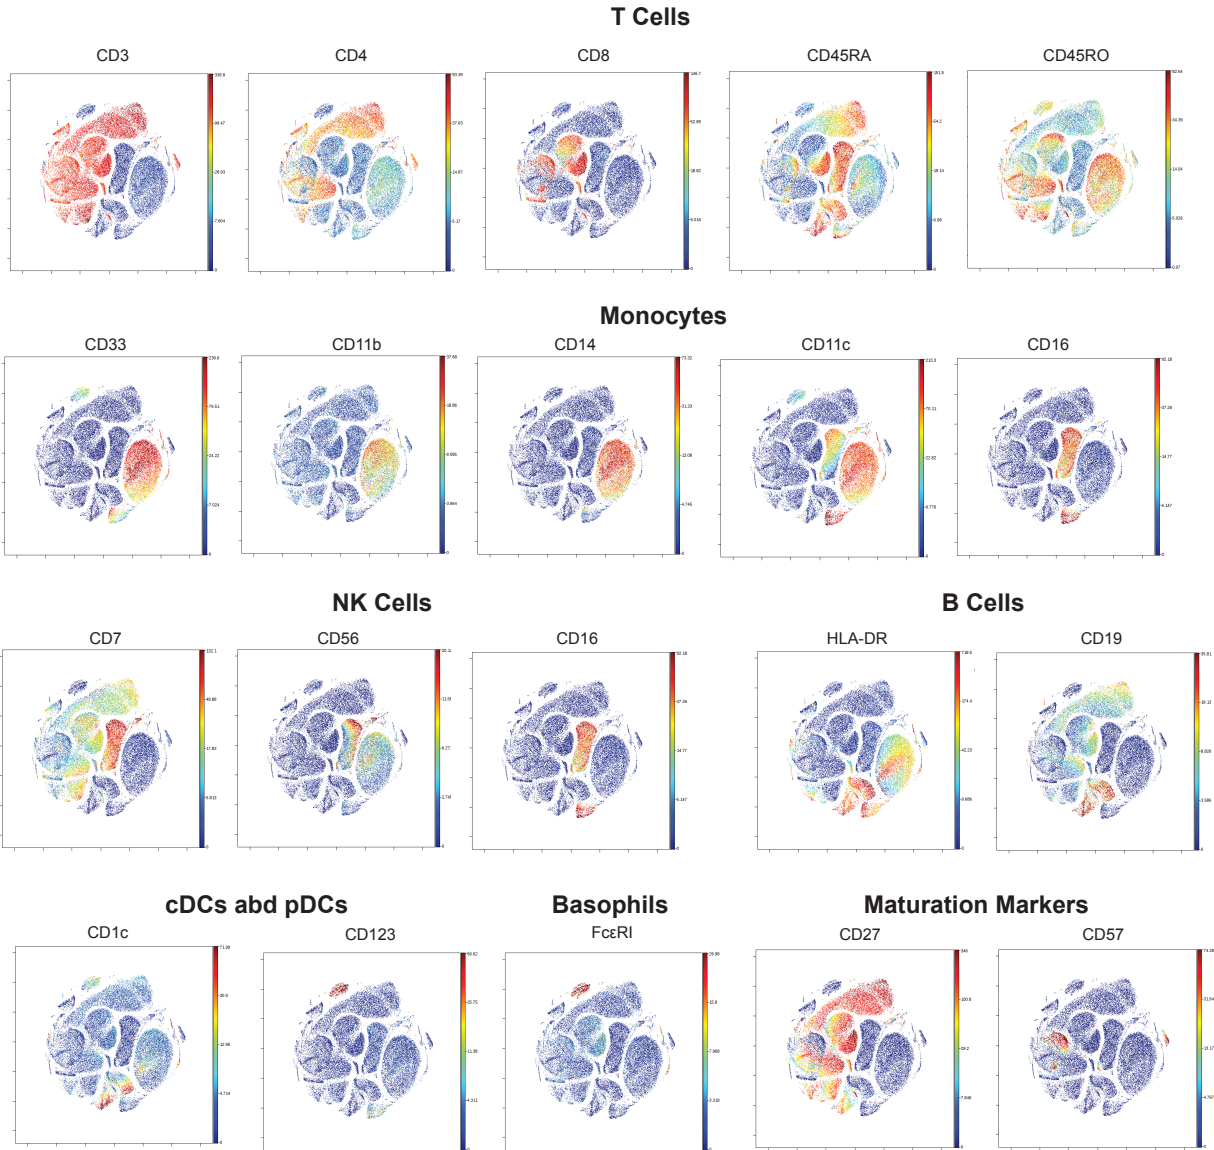

**Figure S8. viSNE Maps Show Distinct Clusters Representing Different Cell Types.** t-SNE analysis was performed with 20 surface markers used in our experiments (**Figure 1, Table S5**). Each dot in the viSNE map represents an individual cell. In all panels, the same viSNE map is shown, colored sequentially by the labeling intensity of each surface marker indicated at the top of the viSNE map. viSNE maps are grouped by cell types defined based on surface marker expression.



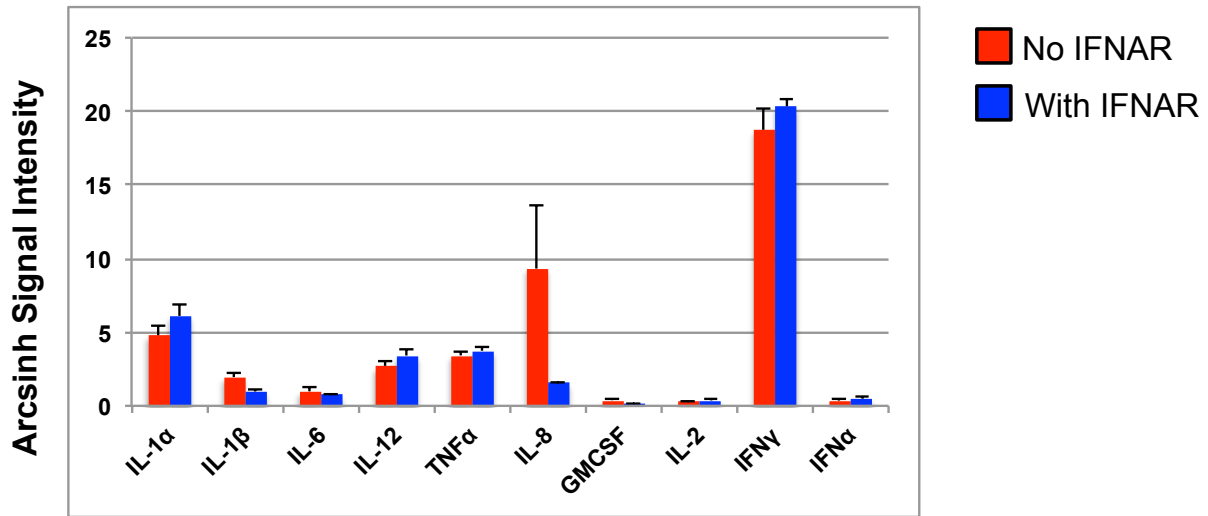

**Figure S9. Variance in CD14<sup>hi</sup> monocytes cytokine induction in healthy donor blood by plasma from SLE patients, with or without IFNAR pre-treatment.** Following incubation of serum samples with healthy donor peripheral whole blood pre-treated or not with IFNAR, cells were processed and analyzed by mass cytometry as described in **Figure 1**. CD14<sup>hi</sup> monocyte population was defined as in **Figure 3C**. Median count values from healthy donor blood pre-treated or not with IFNAR before incubation with serum samples were subtracted (SLE PT6 without ruxolitinib-SLE PT6 with IFNAR) to create a response index (median signal intensity). Average responses from 4 SLE patient plasma samples + SD are shown.

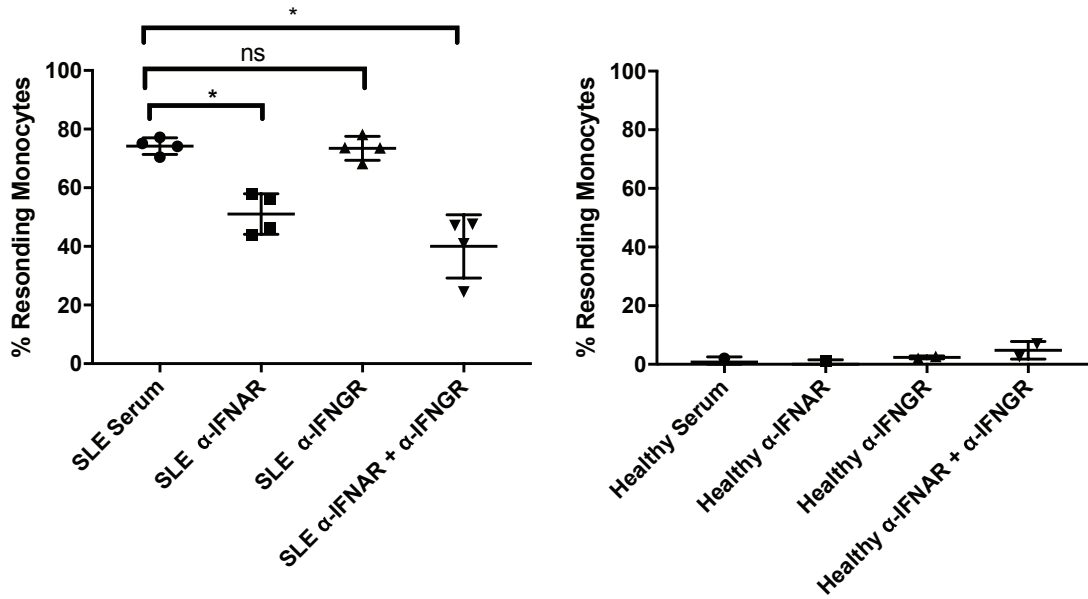

**Figure S10. Effect of IFNGR blockade on SLE-plasma induced MCP1 production.** Plasma from four clinically active SLE patients (left) and healthy participants (right) were incubated with the same healthy donor blood and lysed/fixed as described in **Figure 1**. Healthy donor blood was either untreated (serum), or pre-treated for 90 minutes at 37C with anti-IFNAR antibody ( $\alpha$ -IFNAR), anti-IFNGR antibody ( $\alpha$ -IFNGR), or anti-IFNAR+anti-IFNGR antibody together ( $\alpha$ -IFNAR +  $\alpha$ -IFNGR), prior to incubation with the plasma samples. Processed cells were stained with fluorescently labeled antibodies (**Table S5**) and analyzed by flow cytometry. Hand-gated on CD14hi monocytes, percent responding monocytes were those that demonstrated MCP1 cytokine levels higher than the 95th percentile of unstimulated sample (healthy donor blood only). Averages, minimum and maximum values are shown. Statistical significance (\*) was calculated using paired two-tailed t-tests for the conditions indicated (serum vs. serum + IFNAR blockade; serum vs. serum + IFNGR blockade; serum vs. serum + IFNAR/IFNGR blockade).

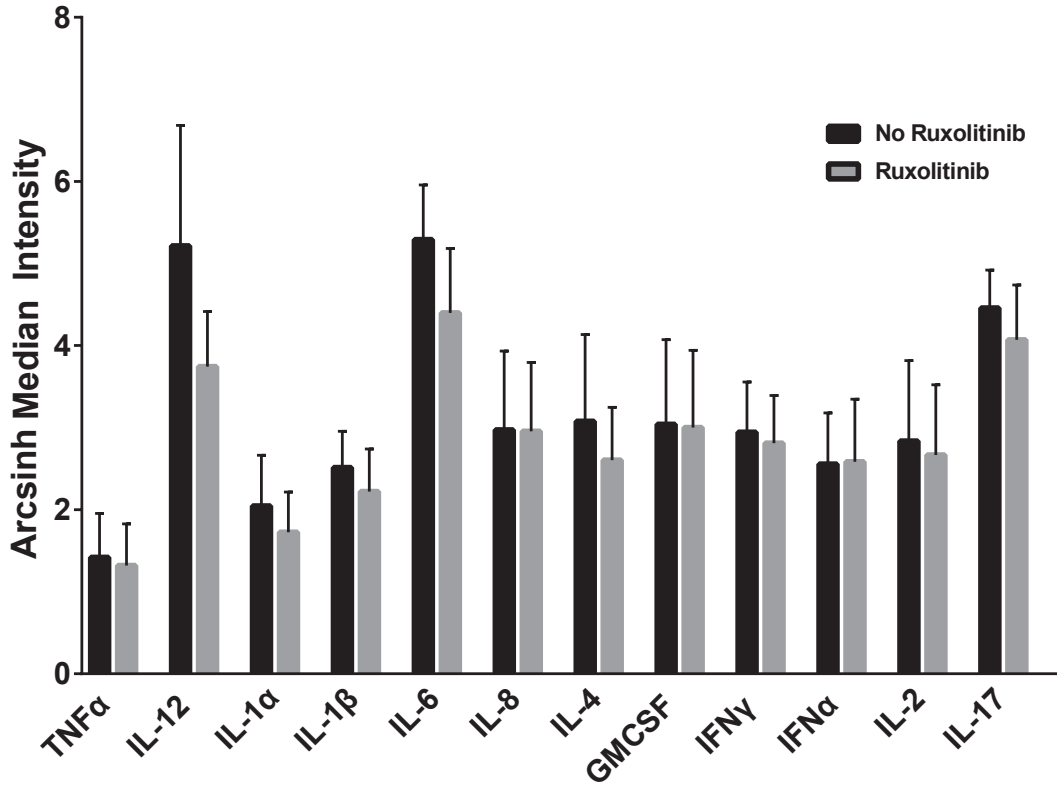

**Figure S11. Variance in CD14<sup>hi</sup> monocytes cytokine induction in healthy donor blood by serum from SLE patients, with or without ruxolitinib pre-treatment.** Following incubation of serum samples with healthy donor peripheral whole blood pre-treated or not with ruxolitinib, cells were processed and analyzed by mass cytometry as described in **Figure 1**. CD14<sup>hi</sup> monocyte population was defined as in **Figure 3C**. Median count values from healthy donor blood pre-treated or not with ruxolitinib before incubation with serum samples were subtracted (SLE PT6 without ruxolitinib-SLE PT6 with ruxolitinib) to create a response index (median signal intensity). Average responses from 25 SLE patient sera samples + SD are shown.

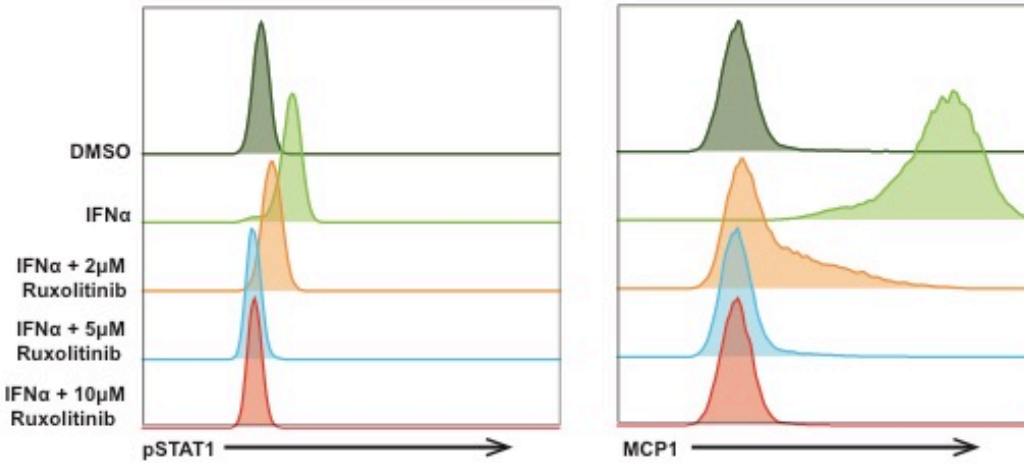

**Figure S12. Ruxolitinib dose titration to evaluate effect of JAK1/2 inhibition on the MCP1/Mip1 $\beta$ /IL-1RA signature.** Following incubation of IFN $\alpha$  with healthy donor peripheral whole blood pre-treated with ruxolitinib at different concentrations, cells were lysed and fixed as described in **Figure 1**. Processed cells were stained with fluorescently labeled antibodies (**Table S5**), and analyzed by flow cytometry. Hand-gated on CD14<sup>hi</sup> monocytes, histograms for pSTAT1 and MCP1 are shown. One representative experiment is shown.

## Supplementary Tables

**Table S1. Summary of demographic data for control and SLE patients.** “As needed” medications were non-prescription medications used sporadically by study participants. For inclusion/exclusion criteria, see Methods, Study Participants section.

| Characteristic                         | Healthy Controls (N=10) | SLE Patients (N=10) |
|----------------------------------------|-------------------------|---------------------|
| Age-- yrs (Range)                      | 15 (12-17)              | 13 (9-16)           |
| Sex, no. (%)                           |                         |                     |
| Male                                   | 3 (30)                  | 3 (30)              |
| Female                                 | 7 (70)                  | 7 (70)              |
| Medical history-- no. (%)              |                         |                     |
| Allergic rhinitis                      | 1 (10)                  | 1 (10)              |
| Acid reflux                            | 1 (10)                  | 0 (0)               |
| Asthma                                 | 2 (20)                  | 1 (10)              |
| Migraines                              | 1 (10)                  | 0 (0)               |
| “As needed” medication usage-- no. (%) |                         |                     |
| Beta agonists                          | 2 (20)                  | 1 (10)              |
| Antihistamines                         | 2 (20)                  | 0 (0)               |
| Non steroidal anti-inflammatory        | 1 (10)                  | 3 (30)              |
| Inhaled corticosteroids                | 1 (10)                  | 1 (10)              |

**Table S2. Conversion of arcsinh difference to absolute median fold change induction.** For all of the mass cytometry analysis, cytokine induction was calculated using the median scaled arcsinh values of T6 samples minus the median scaled arcsinh value of T0 condition. Calculations for this fold change conversion was based on the supplemental material from the Bendall and Simonds et al., 2011 publication.

| Arcsinh Difference | Absolute Fold Change |
|--------------------|----------------------|
| 0.6                | 2                    |
| 1.4                | 5                    |
| 2.1                | 10                   |
| 3.7                | 50                   |
| 4.4                | 100                  |

**Table S3. Summary of laboratory and clinical information for 18 newly diagnosed untreated SLE patients, at 4 different disease timpoints.** S: sex/gender. Mos Dx: Months since Diagnosis. Flare: as defined per ACR criteria and clinical assessment (17, 71). Abbreviations: ESR, erythrocyte sedimentation rate; C3/C4, complement components 3 & 4; HCQ, hydroxychloroquine; MMF, mycophenylate mofetil; ASA, aspirin; CSA, cyclosporine; NSAIDs, LFTs, liver function tests; CTX, Cytoxan.

| SLE Pt | Age (yrs) | S | Mos Dx | SLEDAI | Flare | C3  | C4   | ds DNA | Other Auto Abs | Malar Rash | Heme | Active Renal | Other                                 | Treatment                             |                        |
|--------|-----------|---|--------|--------|-------|-----|------|--------|----------------|------------|------|--------------|---------------------------------------|---------------------------------------|------------------------|
| #31    | 11        | F | 0      | 4      | Yes   | 86  | 6.4  | 80     | Yes            | Yes        | Yes  | No           | Oral ulcers, Arthritis, Elevated LFTs | Start High dose steroids              |                        |
|        |           |   | 4      | 10     | No    | 113 | 10.9 | 20     | Yes            | Yes        | Yes  | No           | Elevated LFTs                         | Low dose steroids, HCQ                |                        |
|        |           |   | 10     | 2      | No    | 126 | 21.6 | 0      | No             | No         | No   | No           | No                                    |                                       | Low dose steroids, HCQ |
|        |           |   | 16     | 0      | No    | 134 | 24.4 | 0      | No             | No         | No   | No           | No                                    |                                       | Low dose steroids, HCQ |
| #43    | 12        | F | 0      | 22     | Yes   | 35  | 2.7  | 160    | Yes            | No         | No   | Yes          | Arthritis, Seizures, Encephalopathy   | Start Solumedrol, CTX                 |                        |
|        |           |   | 72     | 2      | No    | 108 | 11.1 | 0      | No             | No         | No   | No           |                                       | Low dose steroids, MMF, HCQ, baby ASA |                        |
|        |           |   | 78     | 2      | No    | 114 | 13.3 | 0      | No             | No         | No   | No           |                                       | Low dose steroids, MMF, HCQ, baby ASA |                        |
|        |           |   | 80     | 16     | Yes   | 121 | 11.8 | 10     | No             | Yes        | No   | Yes          | Hyperthyroid                          | Increase steroids, HCQ, baby ASA      |                        |
| #51    | 15        | F | 0      | 10     | Yes   | 42  | 3.1  | 5120   | Yes            | Yes        | No   | No           |                                       | Start Steroids                        |                        |
|        |           |   | 6      | 4      | No    | 86  | 5    | 160    | Yes            | Yes        | No   | No           |                                       | Start HCQ, baby ASA                   |                        |
|        |           |   | 12     | 6      | No    | 89  | <5   | >1000  | Yes            |            | No   | No           |                                       | MTX, Low dose steroids                |                        |
|        |           |   | 18     | 6      | Yes   | 65  | <5   | >1000  | Yes            | Yes        | No   | Yes          | Oral ulcers, Arthritis, Hair loss     | Steroid pulse                         |                        |
| #53    | 12        | F | 0      | 10     | Yes   | 110 | 26.9 | 0      | No             | Yes        | Yes  | Yes          |                                       | Start HCQ                             |                        |
|        |           |   | 3      | 2      | No    | 117 | 28.3 | 0      | No             | No         | No   | No           |                                       | Low dose steroids, HCQ                |                        |
|        |           |   | 9      | 0      | No    | 105 | 24.4 | 0      | No             | No         | No   | No           |                                       | Low dose steroids, HCQ, baby ASA      |                        |
|        |           |   | 12     | 0      | No    | 102 | 21.8 | 0      | No             | No         | No   | No           |                                       | Low dose steroids, HCQ, baby ASA      |                        |
| #66    | 17        | M | 0      | 18     | Yes   | 53  | 11   | 1280   | Yes            | Yes        | Yes  | No           | Arthritis, Left ophthalmoplegia       | Start High dose steroids              |                        |
|        |           |   | 3      | 2      | No    | 80  | 17   | 160    | Yes            | No         | No   | No           |                                       | Low dose steroids, HCQ, baby ASA      |                        |
|        |           |   | 18     | 2      | No    | 78  | 12   | 160    | No             | No         | No   | No           |                                       | Low dose steroids, baby ASA           |                        |

|     |    |   |    |    |     |     |      |      |     |     |     |     |                            |                                        |
|-----|----|---|----|----|-----|-----|------|------|-----|-----|-----|-----|----------------------------|----------------------------------------|
|     |    |   | 42 | 2  | No  | 94  | 15   | 80   | No  | No  | No  | No  |                            | Low dose steroids, HCQ, baby ASA       |
| #71 | 14 | F | 0  | 30 | Yes | 28  | 2.2  | 5120 | Yes | Yes | Yes | Yes | Oral ulcers, Serositis     | Start High dose steroids, CTX          |
|     |    |   | 3  | 0  | No  | 116 | 22.3 | 0    | No  | No  | No  | No  |                            | CTX, High dose steroids, HCQ           |
|     |    |   | 38 | 0  | No  | 100 | 22   | 0    | No  | No  | No  | No  |                            | MMF, Low dose steroids, HCQ            |
|     |    |   |    | 0  | No  | 120 | 21   | 0    | No  | No  | No  | No  |                            | Low dose steroids, HCQ                 |
|     |    |   |    |    |     |     |      |      |     |     |     |     |                            |                                        |
| #72 | 7  | F | 0  | 10 | Yes | 87  | 9.5  | 0    | Yes | Yes | Yes | No  | Oral ulcers, Arthritis     | Start High dose steroids, HCQ          |
|     |    |   | 3  | 2  | No  | 101 | 11   | 0    | Yes | Yes | No  | No  |                            | Low dose steroids, HCQ, NSAIDs         |
|     |    |   | 13 | 2  | No  | 96  | 15.3 | 0    | No  | No  | No  | No  |                            | Low dose steroids, HCQ, Imuran, NSAIDs |
|     |    |   | 20 | 8  | Yes | 73  | 8.2  | 20   | Yes | Yes | No  | Yes | Arthritis                  | Start MMF, Tacrolimus                  |
|     |    |   |    |    |     |     |      |      |     |     |     |     |                            |                                        |
| #74 | 9  | F | 0  | 17 | Yes | 68  | 13.3 | 160  | Yes | Yes | Yes | No  | Oral ulcers, Arthritis     | Start High dose steroids, HCQ          |
|     |    |   | 24 | 4  | No  | 91  | 11   | 320  | Yes | No  | No  | No  |                            | Low dose steroids, HCQ, MTX, NSAIDs    |
|     |    |   | 30 | 4  | No  | 81  | 7.8  | 320  | Yes | No  | No  | No  |                            | Low dose steroids, HCQ, Imuran, NSAIDs |
|     |    |   | 33 | 8  | Yes | 79  | 7.1  | 1280 | Yes | No  | Yes | No  | Severe Arthritis           | Increase steroids, HCQ, Imuran, NSAIDs |
|     |    |   |    |    |     |     |      |      |     |     |     |     |                            |                                        |
| #85 | 16 | F | 0  | 4  | Yes | 115 | 32.2 | 0    | No  | Yes | Yes | No  | Photosensitivity           | Start High dose steroids               |
|     |    |   | 5  | 0  | No  | 139 | 42.6 | 0    | No  | No  | No  | No  |                            | Low dose steroids, HCQ                 |
|     |    |   | 12 | 0  | No  | 140 | 45   | 0    | No  | No  | No  | No  |                            | HCQ                                    |
|     |    |   | 18 | 0  | No  | 120 | 40   | 0    | No  | No  | No  | No  |                            | HCQ                                    |
| #86 | 12 | F | 0  | 28 | Yes | <40 | <8   | 2560 | Yes | Yes | Yes | Yes | Arthritis                  | Start Steroid pulse, CTX               |
|     |    |   | 12 | 2  | No  | 92  | 8.1  | 0    | Yes | Yes | Yes | No  | Non compliant with therapy | HCQ, low dose steroids,                |

|      |    |   |    |    |     |     |      |       |     |     |     |     |                                           |                                                                     |  |
|------|----|---|----|----|-----|-----|------|-------|-----|-----|-----|-----|-------------------------------------------|---------------------------------------------------------------------|--|
|      |    |   |    |    |     |     |      |       |     |     |     |     |                                           | Imuran, baby ASA                                                    |  |
|      |    |   | 52 | 4  | No  | 79  | 3.6  | 45    | Yes | No  | No  | No  | Non compliant with therapy                | HCQ, low dose steroids, Imuran, baby ASA                            |  |
|      |    |   | 60 | 20 | Yes | 39  | <2.9 | 796   | Yes | Yes | Yes | Yes |                                           | Start Steroid pulse                                                 |  |
| #90  | 14 | F | 0  | 22 | Yes | 25  | 4.7  | 640   | Yes | Yes | Yes | Yes | Serositis                                 | Start Steroid pulse, CTX                                            |  |
|      |    |   | 3  | 10 | No  | 111 | 16.2 | 0     | Yes | Yes | Yes | Yes |                                           | CTX, Low dose steroids, HCQ                                         |  |
|      |    |   | 42 | 0  | No  | 130 | 30.6 | 0     | No  | No  | No  | No  |                                           | MMF, HCQ, Low dose steroids                                         |  |
|      |    |   |    | 0  | No  | 120 | 25   | 0     | No  | No  | No  | No  |                                           | Low dose steroids, HCQ                                              |  |
|      |    |   |    |    |     |     |      |       |     |     |     |     |                                           |                                                                     |  |
| #100 | 14 | F | 0  | 18 | Yes | 59  | 5.8  | 320   | Yes | Yes | Yes | Yes | Arthritis, Serositis                      | Start Steroids pulse, CTX                                           |  |
|      |    |   | 12 | 8  | No  | 126 | 24.3 | 40    | Yes | No  | No  | No  |                                           | MMF, Low dose steroids, HCQ                                         |  |
|      |    |   | 15 | 20 | Yes | 117 | 19.9 | 40    | Yes | No  | No  | No  | Changes in memory, Vasculitis, Chest pain | MMF, increase steroids, HCQ                                         |  |
|      |    |   | 30 | 5  | No  | 104 | 16.2 | 0     | No  | No  | No  | No  |                                           | MMF, low dose steroids                                              |  |
|      |    |   |    |    |     |     |      |       |     |     |     |     |                                           |                                                                     |  |
| #102 | 13 | F | 0  | 24 | Yes | 27  | 3    | >1280 | Yes | No  | Yes | Yes | Serositis                                 | Start Steroid pulse, CTX, HCQ                                       |  |
|      |    |   | 3  | 18 | No  | 106 | 16   | 2560  | Yes | No  | Yes | Yes | Pleuritis                                 | Low dose steroids, HCQ, CTX                                         |  |
|      |    |   | 9  | 12 | No  | 121 | 16.6 | 1280  | Yes | Yes | No  | Yes |                                           | High dose steroids, MMF, HCQ, received rituximab and steroids pulse |  |
|      |    |   | 12 | 18 | No  | 103 | 17.5 | 640   | No  | No  | No  | Yes |                                           | Mid dose steroids, MMF, HCQ                                         |  |
|      |    |   |    |    |     |     |      |       |     |     |     |     |                                           |                                                                     |  |
| #108 | 13 | M | 0  | 18 | Yes | 74  | 14   | 10    | Yes | Yes | No  | Yes |                                           | Start steroid pulse, CTX                                            |  |
|      |    |   | 6  | 2  | No  | 111 | 16.1 | 0     | No  | No  | No  | No  |                                           | CSA, MMF, Low dose steroids, HCQ                                    |  |
|      |    |   | 9  | 2  | No  | 107 | 17.5 | 0     | No  | No  | No  | No  |                                           | CSA, MMF, Low dose steroids, HCQ                                    |  |
|      |    |   |    |    |     |     |      |       |     |     |     |     |                                           |                                                                     |  |
|      |    |   | 12 | 5  | No  | 107 | 15.9 | 0     | No  | No  | No  | No  |                                           | CSA, MMF, Low dose steroids, HCQ                                    |  |



|      |    |   |    |    |     |     |      |       |     |     |     |     |                              |                                                  |
|------|----|---|----|----|-----|-----|------|-------|-----|-----|-----|-----|------------------------------|--------------------------------------------------|
| #111 | 14 | F | 0  | 29 | Yes | 44  | 6.3  | >1280 | Yes | Yes | Yes | Yes | Oral ulcers, Serositis       | Start Steroid pulse, CTX                         |
|      |    |   | 3  | 4  | No  | 114 | 20.6 | 40    |     |     |     | No  | Hair loss                    | MMF, HCQ, tapering steroids                      |
|      |    |   | 19 | 0  | No  | 141 | 22.1 | 0     |     |     |     | Yes | Concern for compliance       | MMF, HCQ, low dose steroids                      |
|      |    |   | 33 | 9  | Yes | 49  | 1.9  | >1280 |     |     |     | Yes |                              | Non compliant, s/p ritux                         |
|      |    |   |    |    |     |     |      |       |     |     |     |     |                              |                                                  |
| #113 | 11 | F | 0  | 23 | Yes | 31  | 6.8  | >1280 | Yes | No  | Yes | Yes | Serositis                    | Start Steroid pulse, CTX, HCQ                    |
|      |    |   | 3  | 6  | No  | 130 | 38.8 | 40    | No  | No  | No  | Yes | Proteinuria, hematuria still | CTX, Low dose steroids, HCQ                      |
|      |    |   | 12 | 2  | No  | 128 | 29.3 | 320   | No  | No  | No  | No  |                              | CTX, Low dose steroids, HCQ                      |
|      |    |   | 24 | 6  | No  | 129 | 28   | 20    | No  | Yes | No  | No  |                              | Low dose steroids, HCQ, MMF                      |
|      |    |   |    |    |     |     |      |       |     |     |     |     |                              |                                                  |
| #116 | 13 | F | 0  | 4  | Yes | 60  | 8.3  | 320   | Yes | No  | Yes | No  | Arthritis                    | Start high dose steroids, HCQ, baby ASA          |
|      |    |   | 3  | 4  | No  | 73  | 7.7  | 20    | No  | No  | No  | No  | Eating disorder              | Imuran, HCQ, baby ASA, steroids taper            |
|      |    |   | 12 | 4  | No  | 90  | 13.1 | 10    | No  | No  | No  | No  |                              | Imuran, HCQ, baby ASA, Low dose steroids         |
|      |    |   | 18 | 4  | No  | 83  | 14.8 | 80    | No  | No  | No  | No  |                              | Imuran, HCQ, baby ASA, Low dose steroids, NSAIDs |
|      |    |   |    |    |     |     |      |       |     |     |     |     |                              |                                                  |
| #117 | 10 | F | 0  | 22 | Yes | 39  | 4    | 320   | Yes | Yes | Yes | Yes | Serositis, Cerebritis        | Start Steroid pulse, CTX                         |
|      |    |   | 3  | 14 | No  | 163 | 45   | 0     | Yes | Yes | Yes | Yes | Aspiration pneumonia         | Rituximab, MMF, CTX, High dose steroids          |
|      |    |   | 18 | 4  | No  | 151 | 48.8 | 0     | No  | No  | No  | Yes | On dialysis                  | Imuran, HCQ, baby ASA, Low dose steroids         |
|      |    |   | 82 | 4  | No  | 108 | 19.6 | 0     | No  | No  | No  | Yes |                              | Imuran, HCQ, baby ASA, Low dose steroids         |
|      |    |   |    |    |     |     |      |       |     |     |     |     |                              |                                                  |

**Table S4. Box plot values from generalized estimating equation model applied to the longitudinal analysis of monocyte cytokine signature and SLE patients' disease activity.** Normalized signal intensity values for MCP1, Mip1 $\beta$  and IL-1RA indicating the minimum, 1<sup>st</sup> quartile, median, mean, 3<sup>rd</sup> quartile, and maximum for every box plot shown in **Figure 4B, 4C**.

| <b>Clinically Active (Dx + Flare)</b> | <b>MCP1</b> | <b>Mip1<math>\beta</math></b> | <b>IL-1RA</b> |
|---------------------------------------|-------------|-------------------------------|---------------|
| Minimum                               | 1.3         | 1.27                          | 2.81          |
| 1st Quartile                          | 3.76        | 2.28                          | 6.33          |
| Median                                | 17.04       | 4.04                          | 6.98          |
| Mean                                  | 35.9        | 5.291                         | 15.5          |
| 3rd Quartile                          | 41.75       | 6.76                          | 19.29         |
| Maximum                               | 168.84      | 16.49                         | 90.11         |

| <b>Clinically Inactive (PreFlare + Remission)</b> | <b>MCP1</b> | <b>Mip1<math>\beta</math></b> | <b>IL-1RA</b> |
|---------------------------------------------------|-------------|-------------------------------|---------------|
| Minimum                                           | 1.18        | 1.15                          | 2.8           |
| 1st Quartile                                      | 2.36        | 1.72                          | 3.28          |
| Median                                            | 3.12        | 2.62                          | 4.52          |
| Mean                                              | 4.817       | 3.171                         | 5.588         |
| 3rd Quartile                                      | 5.62        | 3.59                          | 6.9           |
| Maximum                                           | 24.56       | 20.46                         | 21.3          |

| <b>Dx</b>    | <b>MCP1</b> | <b>Mip1<math>\beta</math></b> | <b>IL-1RA</b> |
|--------------|-------------|-------------------------------|---------------|
| Minimum      | 1.3         | 1.27                          | 2.81          |
| 1st Quartile | 2.82        | 2.28                          | 4.6           |
| Median       | 5.7         | 4.63                          | 6.76          |
| Mean         | 38.28       | 5.334                         | 16.62         |
| 3rd Quartile | 34.43       | 6.76                          | 12.46         |
| Maximum      | 168.84      | 15.06                         | 90.11         |

| <b>Flare</b> | <b>MCP1</b> | <b>Mip1<math>\beta</math></b> | <b>IL-1RA</b> |
|--------------|-------------|-------------------------------|---------------|
| Minimum      | 2.25        | 1.76                          | 3             |
| 1st Quartile | 10.59       | 2.732                         | 6.428         |
| Median       | 21.93       | 4.02                          | 7.775         |
| Mean         | 31.74       | 5.216                         | 13.542        |
| 3rd Quartile | 42.04       | 6.44                          | 19.608        |
| Maximum      | 131.33      | 16.49                         | 39.77         |

| <b>Pre-Flare</b> | <b>MCP1</b> | <b>Mip1<math>\beta</math></b> | <b>IL-1RA</b> |
|------------------|-------------|-------------------------------|---------------|
| Minimum          | 2.28        | 1.19                          | 2.97          |
| 1st Quartile     | 2.692       | 1.775                         | 3.51          |

|              |       |       |       |
|--------------|-------|-------|-------|
| Median       | 3.665 | 3.36  | 5.245 |
| Mean         | 6.125 | 3.529 | 6.576 |
| 3rd Quartile | 4.742 | 4.155 | 6.705 |
| Maximum      | 24.56 | 9.58  | 21.3  |

| <b>Remission</b> | <b>MCP1</b> | <b>Mip1<math>\beta</math></b> | <b>IL-1RA</b> |
|------------------|-------------|-------------------------------|---------------|
| Minimum          | 1.18        | 1.15                          | 2.8           |
| 1st Quartile     | 2.27        | 1.715                         | 3.26          |
| Median           | 3.02        | 2.58                          | 4.52          |
| Mean             | 4.482       | 3.079                         | 5.334         |
| 3rd Quartile     | 5.655       | 3.145                         | 7.175         |
| Maximum          | 16.11       | 20.46                         | 9.87          |

**Table S5. Summary of antibodies used for mass and fluorescence-based cytometry analysis.** Antibody information includes clone and manufacturer company.

| Antigen                | Clone      | Manufacturer | Mass/ Fluorescence       |
|------------------------|------------|--------------|--------------------------|
| <b>Surface markers</b> |            |              |                          |
| CD1c                   | L161       | Biolegend    | 161                      |
| CD3                    | UCHT1      | BD           | 144                      |
| CD4                    | SK3        | Biolegend    | 155                      |
| CD7                    | M-T701     | BD           | 149                      |
| CD8                    | SK1        | Biolegend    | 142                      |
| CD11b                  | ICRF44     | Biolegend    | 146                      |
| CD11c                  | B-ly6      | BD/BD        | 152/PECy7                |
| CD14                   | M5E2       | Biolegend    | 154/Brilliant Violet 421 |
| CD16                   | B73.1      | eBioscience  | 153                      |
| CD19                   | SJ25C1     | Santa Cruz   | 163                      |
| CD20                   | H1         | BD           | 156                      |
| CD27                   | L128       | BD           | 162                      |
| CD33                   | P67.6      | Santa Cruz   | 167                      |
| CD45                   | HI30       | Biolegend    | 139                      |
| CD45RA                 | HI100      | Biolegend    | 173                      |
| CD45RO                 | UCHL1      | Biolegend    | 145                      |
| CD56                   | MY31       | BD           | 168                      |
| CD57                   | HCD57      | Biolegend    | 113                      |
| CD66                   | B1.1/CD66  | BD/Biolegend | 176/Brilliant Violet 605 |
| CD123                  | 9F5        | BD           | 150                      |
| HLADR                  | L243       | Biolegend    | 174/Alexa Flour 700      |
| FcεRI                  | CRA1       | Biolegend    | 143                      |
| <b>Cytokines</b>       |            |              |                          |
| IL-1α                  | 364-3B3-14 | Biolegend    | 147                      |
| IL-1β                  | H1b-98     | Biolegend    | 169                      |
| IL-1RA                 | AS17       | Santa Cruz   | 157                      |
| IL-2                   | MQ1-17H12  | eBioscience  | 172                      |
| IL-4                   | 8D4-8      | BD           | 151                      |
| IL-6                   | MQ2-13A5   | Biolegend    | 164                      |
| IL-8                   | E8N1       | BD           | 160                      |
| IL-12/IL-23 p40        | C8.6       | Biolegend    | 171                      |
| IL-17A                 | BL168      | Biolegend    | 148                      |
| Perforin               | B-D48      | Abcam        | 141                      |
| GMCSF                  | BVD2-21C11 | BD           | 159                      |
| Mip1β                  | D21-1351   | BD           | 158                      |
| TNFα                   | Mab11      | Biolegend    | 166                      |
| IFNγ                   | 4S.B3      | Biolegend    | 165                      |
| IFNα                   | LT27:295   | Miltenyi     | 175                      |
| MCP1                   | 5D3-F7     | BD           | 170/APC                  |
